# Supplementary material
Source: MDPI journal article supplement (https://www.mdpi.com/2073-4395/14/4/727)
Supplement: s1 [file s1]

**Table S1.** Composition of Knop solution

| With Pi                                                             |                         | With Phi                                                            |                         | Without P                                                           |                         |
|---------------------------------------------------------------------|-------------------------|---------------------------------------------------------------------|-------------------------|---------------------------------------------------------------------|-------------------------|
| Composition                                                         | Concentration<br>(mg/L) | Composition                                                         | Concentration<br>(mg/L) | Composition                                                         | Concentration<br>(mg/L) |
| $\text{Ca}(\text{NO}_3)_2 \cdot 4\text{H}_2\text{O}$                | 1150                    | $\text{Ca}(\text{NO}_3)_2 \cdot 4\text{H}_2\text{O}$                | 1150                    | $\text{Ca}(\text{NO}_3)_2 \cdot 4\text{H}_2\text{O}$                | 1150                    |
| $\text{KH}_2\text{PO}_4$                                            | 200                     | $\text{KH}_2\text{PO}_3$                                            | 200                     | /                                                                   | /                       |
| $\text{KNO}_3$                                                      | 200                     | $\text{KNO}_3$                                                      | 200                     | $\text{KNO}_3$                                                      | 200                     |
| $\text{MgSO}_4 \cdot 7\text{H}_2\text{O}$                           | 200                     | $\text{MgSO}_4 \cdot 7\text{H}_2\text{O}$                           | 200                     | $\text{MgSO}_4 \cdot 7\text{H}_2\text{O}$                           | 200                     |
| EDTA-Fe                                                             | 25                      | EDTA-Fe                                                             | 25                      | EDTA-Fe                                                             | 25                      |
| $\text{H}_3\text{BO}_3$                                             | 2.86                    | $\text{H}_3\text{BO}_3$                                             | 2.86                    | $\text{H}_3\text{BO}_3$                                             | 2.86                    |
| $\text{MnSO}_4 \cdot 4\text{H}_2\text{O}$                           | 2.13                    | $\text{MnSO}_4 \cdot 4\text{H}_2\text{O}$                           | 2.13                    | $\text{MnSO}_4 \cdot 4\text{H}_2\text{O}$                           | 2.13                    |
| $\text{ZnSO}_4 \cdot 7\text{H}_2\text{O}$                           | 0.22                    | $\text{ZnSO}_4 \cdot 7\text{H}_2\text{O}$                           | 0.22                    | $\text{ZnSO}_4 \cdot 7\text{H}_2\text{O}$                           | 0.22                    |
| $(\text{NH}_4)_6\text{Mo}_7\text{O}_{24} \cdot 4\text{H}_2\text{O}$ | 0.08                    | $(\text{NH}_4)_6\text{Mo}_7\text{O}_{24} \cdot 4\text{H}_2\text{O}$ | 0.08                    | $(\text{NH}_4)_6\text{Mo}_7\text{O}_{24} \cdot 4\text{H}_2\text{O}$ | 0.08                    |
| $\text{CuSO}_4 \cdot 5\text{H}_2\text{O}$                           | 0.02                    | $\text{CuSO}_4 \cdot 5\text{H}_2\text{O}$                           | 0.02                    | $\text{CuSO}_4 \cdot 5\text{H}_2\text{O}$                           | 0.02                    |

**Table S2.** Dry height of plant in sand culture experiments (g/plant)

|                        | Plant 1 | Plant 2 | Plant 3 | Plant 4 | Plant 5 | Plant 6 | Plant 7 |
|------------------------|---------|---------|---------|---------|---------|---------|---------|
| ptxD-expressing plants | 6.7735  | 8.5675  | 10.5225 | 9.453   | 10.6375 | 9.959   | 6.532   |
| xiangyou18 plants      | 1.029   | 0.8295  | 1.4175  | 1.239   | 1.3125  | 1.0395  | 1.638   |

Plants were grown in a greenhouse at 25 °C in a 12:12h light/dark cycle with a photon density of approximately  $200 \mu\text{M m}^{-2} \cdot \text{s}^{-1}$  and 60-70% humidity.

**Table S3.** Total phosphorus content in plants (mmol/g)

|                         | <i>ptxD</i> -expressing plants |         |         | Xiangyou18 plants |         |         |
|-------------------------|--------------------------------|---------|---------|-------------------|---------|---------|
|                         | Plant 1                        | Plant 2 | Plant 3 | Plant 1           | Plant 2 | Plant 3 |
| Knop solution with Phi  | 160.48                         | 176.93  | 185.56  | 249.95            | 236.17  | 264.98  |
| Knop solution with Pi   | 188.56                         | 176.93  | 164.49  | 183.96            | 166.12  | 182.99  |
| Knop solution without P | 78.23                          | 102.111 | 95.29   | 86.98             | 92.06   | 109.99  |

**Table S4.** N, P, K content of soil (mg/kg of soil)

|        | Available phosphorus | Available potassium | Alkaline hydrolyzable nitrogen |
|--------|----------------------|---------------------|--------------------------------|
| Plot 1 | 4.76                 | 48.96               | 38.50                          |
|        | 4.43                 | 45.73               | 42.97                          |
|        | 9.56                 | 43.04               | 34.54                          |
|        | 11.28                | 49.11               | 39.70                          |
|        | 7.89                 | 44.55               | 37.29                          |
| Plot 2 | 11.78                | 51.85               | 40.01                          |
|        | 6.46                 | 42.17               | 37.58                          |
|        | 7.34                 | 57.86               | 45.44                          |
|        | 8.74                 | 46.74               | 39.76                          |
|        | 9.38                 | 42.29               | 34.84                          |
| Plot 3 | 3.54                 | 44.29               | 37.80                          |
|        | 8.45                 | 56.27               | 44.60                          |
|        | 6.78                 | 49.16               | 40.69                          |
|        | 7.98                 | 52.79               | 37.27                          |
|        | 9.45                 | 50.97               | 43.46                          |
|        | 7.85                 | 48.39               | 39.63                          |

**Table S5.** Dry weight of weed in pot culture experiments (g/pot)

| Phi concentration<br>(mg/kg of soil) |       | <i>M. aquaticum</i><br>(g/pot) | <i>A. aequalis</i><br>(g/pot) | <i>R. acetosa</i><br>(g/pot) |
|--------------------------------------|-------|--------------------------------|-------------------------------|------------------------------|
| 0                                    | Pot 1 | 5.44                           | 7.35                          | 6.23                         |
|                                      | Pot 2 | 7.18                           | 9.26                          | 8.04                         |
|                                      | Pot 3 | 7.89                           | 10.29                         | 8.10                         |
| 12.5                                 | Pot 1 | 5.33                           | 7.20                          | 6.11                         |
|                                      | Pot 2 | 7.33                           | 9.45                          | 8.20                         |
|                                      | Pot 3 | 8.68                           | 11.32                         | 8.91                         |
| 25                                   | Pot 1 | 5.12                           | 6.84                          | 5.74                         |
|                                      | Pot 2 | 7.27                           | 9.37                          | 8.14                         |
|                                      | Pot 3 | 6.71                           | 12.87                         | 7.29                         |
| 50                                   | Pot 1 | 2.83                           | 7.06                          | 5.36                         |
|                                      | Pot 2 | 4.45                           | 9.45                          | 6.59                         |
|                                      | Pot 3 | 4.81                           | 9.37                          | 7.46                         |
| 100                                  | Pot 1 | 1.31                           | 6.18                          | 2.74                         |
|                                      | Pot 2 | 2.30                           | 7.04                          | 2.57                         |
|                                      | Pot 3 | 2.29                           | 7.93                          | 2.35                         |
| 200                                  | Pot 1 | 0.71                           | 3.60                          | 1.46                         |

|  |       |      |      |      |
|--|-------|------|------|------|
|  | Pot 2 | 0.50 | 2.50 | 0.80 |
|  | Pot 3 | 0.63 | 3.29 | 0.73 |

**Table S6.** Number of plant in different Phi applications (number/m<sup>2</sup>)

|                  | Plot 1 | Plot 2 | Plot 3 |
|------------------|--------|--------|--------|
| WT+No            | 25     | 30     | 29     |
| WT+Pi            | 25     | 26     | 25     |
| <i>ptxD</i> +Pi  | 25     | 28     | 22     |
| WT+Phi           | 21     | 19     | 25     |
| <i>ptxD</i> +Phi | 32     | 29     | 36     |

**Table S7.** Number of green leaves per plant in different Phi applications

|                  | Plant 1 | Plant 2 | Plant 3 | Plant 4 | Plant 5 | Plant 6 | Plant 7 | Plant 8 | Plant 9 | Plant 10 |
|------------------|---------|---------|---------|---------|---------|---------|---------|---------|---------|----------|
| WT+No            | 4       | 5       | 6       | 6       | 6       | 6       | 6       | 7       | 5       | 4        |
| WT+Pi            | 5       | 4       | 6       | 5       | 6       | 6       | 6       | 5       | 5       | 5        |
| <i>ptxD</i> +Pi  | 3       | 7       | 6       | 6       | 7       | 5       | 5       | 6       | 5       | 6        |
| WT+Phi           | 4       | 7       | 6       | 5       | 7       | 6       | 6       | 7       | 6       | 6        |
| <i>ptxD</i> +Phi | 6       | 7       | 7       | 5       | 7       | 8       | 8       | 6       | 6       | 7        |

**Table S8.** Dry height of plant in fields with different Phi applications (g/plant)

|                  | Plant 1 | Plant 2 | Plant 3 | Plant 4 | Plant 5 | Plant 6 | Plant 7 | Plant 8 | Plant 9 | Plant 10 |
|------------------|---------|---------|---------|---------|---------|---------|---------|---------|---------|----------|
| WT+No            | 0.78    | 0.63    | 0.83    | 0.54    | 0.98    | 1.20    | 1.50    | 0.78    | 0.38    | 0.75     |
| WT+Pi            | 2.01    | 3.25    | 1.89    | 3.15    | 1.38    | 0.98    | 2.56    | 1.05    | 0.98    | 2.12     |
| <i>ptxD</i> +Pi  | 1.01    | 1.08    | 2.35    | 2.11    | 2.22    | 3.78    | 3.12    | 2.01    | 1.08    | 0.98     |
| WT+Phi           | 0.99    | 0.98    | 1.25    | 0.79    | 1.18    | 1.35    | 1.56    | 0.75    | 0.44    | 0.35     |
| <i>ptxD</i> +Phi | 9.25    | 7.45    | 8.66    | 5.89    | 5.68    | 8.22    | 9.15    | 5.56    | 5.89    | 9.53     |
